# Supplementary material for: Prodrugs of HIV protease inhibitors—saquinavir, indinavir and nelfinavir—derived from diglycerides or amino acids: synthesis, stability and anti-HIV activity
Source: Royal Society of Chemistry journal article supplement (doi:10.1039/b313119j), 2004-01-01
Supplement: b313119j.doc [file b313119j.doc]

# Supplementary data

Prodrugs of HIV protease inhibitors - saquinavir, indinavir and nelfinavir - deriving from diglycerides or amino acids: synthesis, stability and anti-HIV activity

Bérangère Gaucher,a Marielle Rouquayrol,a Dominique Roche,a Jacques Greiner,a Anne-Marie Aubertin,b and Pierre Vierlinga*

a Laboratoire de Chimie Bioorganique, UMR 6001 CNRS, Université de Nice Sophia-Antipolis, Parc Valrose, 06108 Nice Cédex 2, France. E-mail: vierling@unice.fr; Fax: (33) (0)4 92 07 61 51; Tel.: (33) (0)4 92 07 61 43.

b INSERM U74, Institut de Virologie, 3 rue Koeberlé, 67000 Strasbourg, France

*To whom correspondence should be addressed.

### Experimental procedures

**Synthesis of *N*-Boc-Tyr[O(CH2)4CO2H]-OtBu**. Ethyl 5-bromopentanoate (5.70 mL, 35.6 mmol) was added dropwise to Boc-Tyr(OH)-OtBu (4.0 g, 11.9 mmol) in anhydrous DMF (60 mL) at room temperature, followed by K2CO3 (4.9 g, 35.6 mmol). After stirring for 12 h, DMF was evaporated and the reaction mixture extracted with AcOEt (350 mL). The organic layer was then washed until neutrality, dried over anhydrous Na2SO4, filtered and concentrated under reduced pressure. The residue was purified on silica gel column (1:0 to 7:3 hexane/AcOEt) to afford *N*-Boc-Tyr[O(CH2)4CO2Et]-OtBu (5.6 g, 99%) as a colorless oil: Rf (7:3 hexane/AcOEt) = 0.7; 1H NMR (CDCl3): 1.23 (*t*, *J* 7.1, 3H, CH3CH2), 1.40 (*s*, 18H, tBu), 1.79 (*m*, 4H, OCH2(CH2)2), 2.34 (*m*, 2H, C(O)CH2), 2.96 (*d*, *J* 5.9, 2H, CH2CH), 3.92 (*m*, 2H, OCH2CH2), 4.11 (*q*, *J* 7.1, 2H, CH3CH2), 4.37 (*m*, 1H, CHNH), 4.97 (*d*, *J* 8.0, 1H, NH), 6.78 and 7.04 (*d*, *d*, *J* 8.7, 2H, 2H, CH=CH); 13C NMR (CDCl3): 14.3 (CH3CH2), 21.7 (C(O)CH2CH2), 28.0, 28.4 (CH3C), 28.8 (OCH2CH2), 34.0 (C(O)CH2), 37.7 (CH2CH), 55.1 (CHNH), 60.3 (CH3CH2), 67.5 (OCH2CH2), 81.9 (CH3C), 114.5 (OC=CH), 128.4 (CH2C=CH), 130.5 (CH2C=CH), 155.5 (NHC(O)), 158.0 (OC=CH), 171.1 and 173.4 (C(O)O). Hydrolysis of *N*-Boc-Tyr[O(CH2)4CO2Et]-OtBu (5.0 g, 10.7 mmol) was performed in aqueous LiOH 1N solution (12.8 mL) and THF (45 mL) at room temperature. After 12 h of stirring, THF was evaporated and the reaction mixture washed with AcOEt. After acidification of the aqueous layer with 5% KHSO4 solution (pH 6-7), the reaction mixture was extracted with AcOEt (350 mL). The organic layer was then washed until neutrality, dried over Na2SO4, filtered and evaporated giving 4.0 g (85%) of *N*-Boc-Tyr[O(CH2)4CO2H]-OtBu as a white solid: Rf (7:3 hexane/AcOEt) = 0.3; 1H NMR (CDCl3): 1.38 (*s*, 18H, tBu), 1.79 (*m*, 4H, OCH2(CH2)2), 2.40 (*m*, 2H, C(O)CH2), 2.96 (*m*, 2H, CH2CH), 3.91 (*bs*, 2H, OCH2CH2), 4.14 and 4.38 (*m*, 0.2H and 0.8H, CHNH), 5.08 (*d*, *J* 8.2, 0.8H, NH), 6.04 (*m*, *J* 7.0, 0.2H, NH), 6.77 and 7.04 (*d*, *d*, *J* 8.5, 2H, 2H, CH=CH), 11.3 (*bs*, 1H, C(O)OH); 13C NMR (CDCl3): 21.5 (C(O)CH2CH2), 28.0, 28.3 (CH3C), 28.6 (OCH2CH2), 33.7 (C(O)CH2), 37.6 (CH2CH), 55.0 (CHNH), 67.4 (OCH2), 79.7 (CH3C), 82.0 (CH3C), 114.4 (OC=CH), 128.4 (CH2C=CH), 130.5 (CH2C=CH), 155.3 (NHC(O)), 158.0 (OC=CH), 171.2 (C(O)OC), 178.8 (C(O)OH). The doubling of some signals is due to restricted rotation of the amide bond.

**Synthesis of *N*-Boc-Tyr[O(CH2)4NCO]-OtBu**. Acetone was added to an aqueous suspension of *N*-Boc-Tyr[O(CH2)4CO2H]-OtBu (700 mg, 1.60 mmol) until a clear solution was obtained. Then Et3N (0.25 mL, 1.85 mmol) in acetone (3 mL) was added to the mixture cooled at 0°C followed by dropwise addition of ethyl chloroformate (0.20 mL, 2.08 mmol) in acetone (1 mL). After stirring for 30 min at 0°C, NaN3 (157 mg, 2.42 mmol) solubilized in H2O (0.55 mL) was added and stirred for 2 h at 0°C. The reaction medium was then poured into ice water and extracted with Et2O (320 mL). The organic layer was dried over Na2SO4, filtered and evaporated giving a viscous liquid consisting into a 80/20 mixture of *N*-Boc-Tyr[O(CH2)4CON3]-OtBu and the isocyanate Boc-Tyr[O(CH2)4NCO]-OtBu (Rf (7:3 hexane/AcOEt) = 0.5 and 0.3, respectively). Transformation of *N*-Boc-Tyr[O(CH2)4CON3]-OtBu into *N*-Boc-Tyr[O(CH2)4NCO]-OtBu was achieved in anhydrous toluene (1 mL) under reflux until evolution of N2 stopped. Evaporation of toluene led to *N*-Boc-Tyr[O(CH2)4NCO]-OtBu (600 mg, 74%) as an oil: 1H NMR (CDCl3): 1.43 (*s*, 18H, tBu), 1.83 (*m*, 4H, OCH2(CH2)2), 3.00 (*d*, *J* 5.8, 2H, CH2CH), 3.30 (*m*, 2H, CH2NCO), 3.95 (*m*, 2H, OCH2CH2), 4.41 (*m*, 1H, CHNH), 4.98 (*d*, *J* 8.3, 1H, NH), 6.80 and 7.08 (*d*, *d*, *J* 8.5, 2H, 2H, CH=CH). 13C NMR (CDCl3): 26.4, 26.5 (NCH2CH2CH2), 28.0, 28.3 (CH3C), 37.6 (CH2CH), 45.4 (NCH2), 55.0 (CHNH), 67.3 (OCH2), 79.7 and 82.0 (CH3C), 114.4 (OC=CH), 128.6 (CH2C=CH), 130.6 (CH2C=CH), 155.1 (NHC(O)), 157.8 (OC=CH), 171.0 (C(O)O); the NCO resonance could not be located. IR: (N=C=O)] = 2073 cm-1. The 1H and 13C NMR (CDCl3) of *N*-Boc-Tyr[O(CH2)4CON3]-OtBu are identical to those of the isocyanate *N*-Boc-Tyr[O(CH2)4NCO]-OtBu, except that the 1H multiplet at 3.30 ppm of CH2NCO has been replaced by the multiplet at 2.44 ppm of the C(O)CH2, and the 13C signals of OCH2CH2CH2CH2NCO have been replaced by those of OCH2CH2CH2CH2CON3 [21.5 (C(O)CH2CH2), 28.1 (OCH2CH2), 42.8 (C(O)CH2), 67.0 (OCH2)].

**Analysis of protected amino acid-derived prodrugs**

Concerning the description of the NMR spectra, the atoms of the protease inhibitor part are depicted as Hx and Cy, those of the substituent as Hx' and Cy' (see Figures 1 and 4 of the article for numbering, respectively). For the diester prodrug derivatives, the Hx'a (Cy'a) and Hx'b (Cy'b) notation refers to the chemical shift of the hydrogen atom (carbon atom) of the substituent linked to the C14/C18 and C8/C1 hydroxyl of indinavir/nelfinavir, respectively.

**Protected leucine-derived prodrugs**

**Saq-LeuP**:Rf (AcOEt) = 0.75; 1H NMR (CDCl3): 0.98 (*d*, *J* 5.6, 6H, H1’, H3’), 1.33 (*s*, 9H, H41), 1.43 (*s*, 9H, CH3 Boc), 1.45-2.10 (*m*, 11H, H31-34, H2’, H4’), 2.15-3.10 (*m*, 13H, H13, H19, H27, H29, H30, H35-37), 4.49 (*m*, 2H, H18, H5’), 4.81 (*m*, 1H, H12), 5.35 (*m*, 1H, H26), 5.45 (*d*, *J* 9.0, 1H, H6’), 5.79 (*bs*, 1H, H39), 6.28 (*bs*, 1H, H15), 6.90-7.20 (*m*, 5H, H21-25), 7.56 (*d*, 1H, H17, *J* 7.8), 7.60 (*td*, *J* 1.1, 8.0, 1H, H3), 7.75 (*td*, *J* 1.1, 8.0, 1H, H2), 7.85 (*d*, *J* 8.0, 1H, H4), 8.14 (*d*, *J* 8.0, 1H, H1), 8.19 (*d*, *J* 8.5, 1H, H6), 8.27 (*d*, *J* 8.5, 1H, H7), 9.15 (*d*, *J* 7.8, 1H, H11); 13C NMR (CDCl3): 20.9, 25.8, 26.1, 30.7 (C31-34), 21.7, 23.2 (C1’, C3’), 24.9 (C2’), 28.5 (CH3 Boc), 28.9 (C41), 30.7 (C36), 33.3 (C35), 34.6 (C19), 35.6 (C30), 37.6 (C13), 41.2 (C4’), 49.8 (C18), 51.0 (C40), 51.3 (C12), 52.3 (C5’), 56.0 (C27), 58.8 (C29), 70.7 (C37), 74.7 (C26), 80.0 (C Boc), 118.7 (C7), 126.5 (C23), 127.7 (C3), 128.1 (C4), 128.5 (C22, C24), 129.1 (C21, C25), 129.4 (C5), 130.2 (C1, C2), 137.2 (C20), 137.4 (C6), 146.7 (C9), 149.1 (C8), 155.9 (C(O) Boc), 164.7 (C10), 170.1 (C38), 173.1, 173.3, 173.5 (C14, C16, C7').

**Ind(8)-LeuP** and **Ind-[LeuP]2**.

**Ind(8)-LeuP**: Rf (9:1 AcOEt/MeOH) = 0.45; 1H NMR (CDCl3): 0.75 (*d*, *J* 6.0, 6H, H1’, H3’), 1.27, 1.28 (*2s*, 18H, H23, CH3 Boc), 1.30-1.55 (*m*, 5H, H13, H2’, H4’), 2.30-3.15 (*m*, 14H, H7, H12, H15-19, H30), 3.42 (*s*, 2H, H24), 3.75-4.00 (*m*, 2H, H14, H5’), 5.23 (*d*, *J* 7.8, 1H, H6’), 5.38 (*m*, 1H, H8), 5.61 (*dd*, *J* 5.0, 8.8, 1H, H9), 6.85 (*d*, *J* 8.8, 1H, H10), 7.05-7.28 (*m*, 10H, H2-5, H27, H32-36), 7.44 (*bs*, 1H, H21), 7.57 (*d*, *J* 7.8, 1H, H26), 8.45 (*m*, 2H, H28, H29); 13C NMR (CDCl3): 21.9, 22.6 (C1’, C3’), 24.7 (C2’), 28.3 (CH3 Boc), 28.9 (C23), 37.4 (C7), 37.7 (C13), 38.9 (C30), 40.8 (C4’), 45.1 (C12), 48.6 (C18), 51.0 (C22), 52.3 (C5’), 52.5, 54.8 (C16, C17), 55.4 (C9), 60.1 (C24), 61.5 (C15), 64.8 (C19), 65.8 (C14), 77.0 (C8), 79.8 (C Boc), 123.4 (C27), 123.7 (C5), 124.8 (C34), 126.2, 127.0 (C3, C4), 127.9 (C2), 128.3 (C33, C35), 129.0 (C32, C36), 132.7 (C25), 136.8 (C26), 139.0, 139.5 (C1, C6), 140.9 (C31), 148.9 (C28), 150.4 (C29), 155.5 (C(O) Boc), 169.7 (C20), 172.3 (C7'), 175.4 (C11).

**Ind-[LeuP]2**: Rf (9:1 AcOEt/MeOH) = 0.6; 1H NMR (CDCl3): 0.61 (*d*, *J* 5.0, 3H, H1’ or H3’), 0.72 (*d*, *J* 5.6, 3H, H1’ or H3’), 0.93 (*d*, *J* 6.4, 3H, H1’ or H3’), 0.94 (*d*, *J* 6.5, 3H, H1’ or H3’), 1.26, 1.34, 1.38 (*3s*, 27H, H23, CH3 Boc), 1.45-1.85 (*m*, 8H, H13, H2’, H4’), 2.10-3.20 (*m*, 14H, H7, H12, H15-19, H30), 3.45 (*s*, 2H, H24), 4.12 (*m*, 1H, H5’b), 4.52 (*q*, *J* 7.5, 1H, H5’a), 5.12 (*d*, *J* 8.7, 1H, H6’b), 5.21 (*m*, 1H, H14), 5.38 (*m*, 1H, H8), 5.55 (*dd*, *J* 4.2, 8.2, 1H, H9), 5.86 (*d*, *J* 7.5, 1H, H6’a), 7.05-7.35 (*m*, 11H, H2-5, H21, H26, H32-36), 7.44 (*d*, *J* 8.2, 1H, H10), 7.61 (*m*, 1H, H27), 8.53 (*m*, 2H, H28, H29); 13C NMR (CDCl3): 21.9, 22.3, 22.8 (C1’, C3’), 24.7, 24.9 (C2’), 28.2, 28.3 (CH3 Boc), 29.0 (C23), 36.1 (C13), 42.6 (C4’a), 37.4 (C7), 39.1 (C30), 40.5 (C4’b), 43.1 (C12), 49.0 (C18), 50.9 (C22), 51.7 (C5’b), 52.9 (C5’a), 52.5, 55.5 (C16, C17), 56.1 (C9), 59.3 (C15), 60.1 (C24), 66.7 (C19), 70.1 (C14), 77.7 (C8), 79.7, 79.8 (C Boc), 123.4 (C27), 124.0 (C5), 124.7 (C34), 126.1, 127.1 (C3, C4), 127.7 (C2), 128.3 (C33, C35), 129.3 (C32, C36), 132.8 (C25), 136.7 (C26), 138.8, 139.1 (C1, C6), 141.4 (C31), 148.9 (C28), 150.4 (C29), 155.3 and 156.5 (C(O) b Boc), 169.9 (C20), 173.1 and 175.2 (C7'b), 175.1 (C11).

**Protected phenylalanine-derived prodrugs**

**Saq-PheP**: Rf (1:1 hexane/AcOEt) = 0.16; 1H NMR (CDCl3): 1.33 (*s*, 9H, H41), 1.37 (*s*, 9H, CH3 Boc), 1.40-1.90 (*m*, 8H, H31-34), 2.15-3.35 (*m*, 15H, H13, H19, H27, H29, H30, H35-37, H7’), 4.49 (*m*, 1H, H18), 4.65 (*m*, 1H, H8’), 4.85 (*m*, 1H, H12), 5.34 (*m*, 1H, H26), 5.48 (*d*, *J* 8.0, 1H, H9’), 5.78 (*bs*, 1H, H39), 6.19 (*bs*, 1H, H15), 6.23 (*bs*, 1H, H15), 6.95-7.30 (*m*, 10H, H21-25, H2’-6’), 7.62 (*m*, 2H, H3, H17), 7.76 (*dd*, *J* 7.0, 8.0, 1H, H2), 7.86 (*d*, *J* 8.0, 1H, H4), 8.16 (*d*, *J* 7.0, 1H, H1), 8.20 (*d*, *J* 8.5, 1H, H6), 8.28 (*d*, *J* 8.5, 1H, H7), 9.12 (*d*, *J* 7.4, 1H, H11); 13C NMR (CDCl3): 20.8, 25.8, 26.2, 30.7 (C31-34), 28.3 (CH3 Boc), 28.9 (C41), 30.7 (C36), 33.3 (C35), 34.4 (C19), 35.6 (C30), 37.7 (C13), 38.0 (C7’), 49.8 (C18), 51.0 (C40), 51.3 (C12), 54.8 (C8’), 56.0 (C27), 58.5 (C29), 70.7 (C37), 74.9 (C26), 80.0 (C Boc), 118.7 (C7), 126.5 (C23), 127.0 (C4’), 127.7 (C3), 128.1 (C4), 128.5 (C22, C24), 128.7 (C3’, C5’), 129.0 (C25, C25), 129.4 (C5, C2’, C6’), 130.2 (C1, C2), 136.9 (C20), 137.3 (C1’), 137.4 (C6), 146.7 (C9), 149.1 (C8), 155.6 (C(O) Boc), 164.7 (C10), 170.2 (C38), 171.7, 173.4, 173.5 (C14, C16, C10').

**Ind(8)-PheP**: Rf (9:1 AcOEt/MeOH) = 0.45; 1H NMR (CDCl3): 1.33, 1.40 (*2s*, 18H, H23, CH3 Boc), 1.80-1.95 (*m*, 2H, H13), 2.30-3.15 (*m*, 16H, H7, H12, H15-19, H30, H7’), 3.47 (*s*, 2H, H24), 3.80-4.10 (*m*, 2H, H14, H8’), 5.21 (*m*, 2H, H8, H9’), 5.64 (*dd*, *J* 5.0, 9.2, 1H, H9), 6.27 (*d*, *J* 9.2, 1H, H10), 6.86 (*dd*, *J* 5.3, 7.4, 2H, H3’, H5’), 7.13-7.30 (*m*, 13H, H2-5, H27, H32-36, H2’, H4’, H6’), 7.60 (*m*, 2H, H21, H26), 8.50 (*m*, 2H, H28, H29); 13C NMR (CDCl3): 28.3 (CH3 Boc), 29.0 (C23), 37.4 (C7), 37.9 (C7’), 38.1 (C13), 39.2 (C30), 45.8 (C12), 48.3 (C18), 51.1 (C22), 52.6, 54.8 (C16, C17), 54.7 (C8’), 55.1 (C9), 60.2 (C24), 61.5 (C15), 64.6 (C19), 65.8 (C14), 77.6 (C8), 80.0 (C Boc), 123.4 (C27), 123.7 (C5), 124.8 (C34), 126.2, 126.8 (C3, C4), 127.0 (C4’), 128.0 (C2), 128.4 (C33, C35, C3’, C5’), 129.0 (C2’, C6’), 129.2 (C32, C36), 132.6 (C25), 136.4 (C1’), 136.8 (C26), 139.0, 139.6 (C1, C6), 140.8 (C31), 149.0 (C28), 150.5 (C29), 155.1 (C(O) Boc), 169.5 (C20), 170.9 (C10'), 175.1 (C11).

**Protected tyrosine-derived prodrugs**

**Ester conjugates**

**Saq-C(O)C4TyrP**: Rf (AcOEt) = 0.7; 1H NMR (CDCl3): 1.31 (*s*, 9H, H41), 1.38 (*s*, 18H, CH3 Boc and tBu), 1.45-2.00 (*m*, 12H, H31-34, H12', H13'), 2.15-3.10 (*m*, 17H, H13, H19, H27, H29, H30, H35-37, H7’, H14'), 3.90 (*m*, 2H, H11'), 4.38 (*m*, 2H, H18, H8’), 4.80 (*m*, 1H, H12), 5.02 (*d*, *J* 8.1, 1H, H9’), 5.31 (*m*, 1H, H26), 5.86 (*bs*, 1H, H39), 6.49 (*bs*, 1H, H15), 6.65 (*bs*, 1H, H15), 6.76 (*d*, *J* 8.6, 2H, H2’, H6’), 6.91 (*m*, 1H, H23), 7.15 (*m*, 6H, H21, H22, H23, H24, H3’, H5’), 7.56 (*td*, *J* 1.6, 8.0, 1H, H3), 7.75-7.66 (*m*, 2H, H2, H17), 7.80 (*d*, *J* 8.0, 1H, H4), 8.09 (*d*, *J* 8.1, 1H, H1), 8.12 (*d*, *J* 8.5, 1H, H6), 8.21 (*d*, *J* 8.5, 1H, H7), 9.17 (*d*, J 7.4, 1H, H11); 13C NMR (CDCl3): 21.5 (C13'), 20.6, 25.8, 26.1, 30.6 (C31-34), 28.0, 28.3 (CH3 Boc and tBu), 28.7 (C41), 28.8 (C12'), 30.7 (C36), 33.1 (C35), 34.0 (C14'), 35.3 (C19), 35.6 (C30), 37.3 (C13), 37.5 (C7’), 49.7 (C18), 50.9 (C40), 51.7 (C12), 55.0 (C8’), 56.8 (C27), 59.6 (C29), 67.4 (C11'), 70.5 (C37), 73.4 (C26), 79.6 (C Boc), 81.9 (C OtBu), 114.4 (C2’, C6’), 118.6 (C7), 126.4 (C23), 127.6 (C3), 128.0 (C4), 128.4 (C22, C24, C4’), 129.1 (C21, C25), 129.3 (C5), 130.1 (C1, C2), 130.5 (C3’, C5’), 137.1 (C20), 137.3 (C6), 146.5 (C9), 149.0 (C8), 155.1 (C(O) Boc), 157.9 (C1’), 164.5 (C10), 170.3 (C38), 173.1, 173.4, 173.7 (C14, C16, C10', C15'); ESI(+) MS: m/z = 1091.0 (M+H)+ and 1113 (M+Na)+ in agreement with the calculated mass for [M] = C61H83N7O11.

**Ind(8)-C(O)C1TyrP**, **Ind(14)-C(O)C1TyrP** and **Ind-[C(O)C1TyrP]2**.

**Ind(8)-C(O)C1TyrP**: Rf (9:1 AcOEt/MeOH) = 0.4; RT (column I, solvent B, 210 nm) = 17.1 min; 1H NMR (CDCl3): 1.25 (s, 9H, H23), 1.34, 1.41 (2s, 18H, CH3 Boc and tBu), 1.42, 1.90 (2m, 2H, H13), 2.16-3.20 (m, 16H, H7, H12, H30, H15-19, H7'), 3.40 (s, 2H, H24), 3.77 (m, 1H, H14), 4.13 and 4.20 (AB system, *2JAB* 15.8, 2H, H11'), 4.37 (m, 1H, H8'), 5.04 (d, *J* 8.3, 1H, H9'), 5.31 (td, *J* 5.1, 1.5, 1H, H8), 5.67 (dd, *J* 5.1, 9.2, 1H, H9), 6.17 (d, *J* 9.2, 1H, H10), 6.67 (d, *J* 8.6, 2H, H2’, H6’), 7.02 (d, *J* 8.6, 2H, H3’, H5’), 7.09-7.30 (m, 10H, H2-5, H27, H32-36), 7.58 (dt, *J* 7.8, 1.5, 1H, H26), 7.72 (sl, 1H, H21), 8.51 (m, 2H, H28, H29); 13C NMR (CDCl3): 28.1, 28.4 (CH3 Boc and tBu), 29.1 (C23), 37.5, 37.6 (C7, C7'), 38.6 (C13), 39.5 (C30), 46.4 (C12), 48.1 (C18), 51.2 (C22), 52.8, 54.7 (C16, C17), 55.0, 55.1 (C9, C8'), 60.3 (C24), 61.5 (C15), 64.1 (C19), 65.4 (C11'), 66.0 (C14), 77.2 (C8), 79.7 (C11'), 82.0 (C14'), 114.8 (C2’, C6’), 123.5, 123.6 (C5, C27), 125.1 (C34), 126.5, 127.1 (C3, C4), 128.2 (C2), 128.4 (C33, C35), 129.0 (C32, C36), 129.8 (C4’), 130.6 (C3’, C5’), 132.5 (C25), 136.8 (C26), 139.1, 139.8 (C1, C6), 140.7 (C31), 149.2 (C28), 150.6 (C29), 155.2 (C(O) Boc), 156.7 (C1’), 168.0 (C12'), 169.4 (C20), 171.0 (C10'), 174.9 (C11).

**Ind(14)-C(O)C1TyrP**: Rf (9:1 AcOEt/MeOH) = 0.7; RT (column I, solvent B, 210 nm) = 17.9 min; 1H NMR (CDCl3): 1.32 (*s*, 9H, H23), 1.34, 1.41 (2*s*, 18H, CH3 Boc and tBu), 1.63, 1.92 (2 m, 2H, H13), 2.24-3.08 (m, 16H, H7, H12, H15-19, H30, H7'), 3.45 (s, 2H, H24), 4.13 (m, 1H, H8), 4.31 (m, 1H, H8'), 4.58 and 4.63 (AB system, *2JAB* 16.0, 2H, H11'), 4.99 (d, *J* 8.1, 1H, H9'), 5.26 (m, 2H, H9, H14), 5.57 (d, *J* 9.0, 1H, H10), 6.75 (d, *J* 8.6, 2H, H2’, H6'), 6.91 (d, *J* 8.6, 2H, H3’, H5’), 7.05-7.31 (m, 11H, H2-5, H21, H27, H32-36), 7.62 (dt, *J* 7.8, 1.6, 1H, H26), 8.48 (d, *J* 1.6, 1H, H29), 8.49 (dd, *J* 4.8, 1.6, 1H, H28); 13C NMR (CDCl3): 28.0, 28.4 (CH3 Boc and tBu), 29.0 (C23), 35.5 (C13), 37.7 (C7'), 39.3 (C7), 40.3 (C30), 46.3 (C12), 50.3 (C18), 51.1 (C22), 52.4, 55.9 (C16, C17), 55.0 (C8'), 57.6 (C9), 59.2 (C15), 60.0 (C24), 65.8 (C11'), 67.1 (C19), 71.4 (C14), 73.2 (C8), 77.8 (C Boc), 82.1 (C OtBu), 114.3 (C2’, C6’), 123.5 (C27), 124.3 (C5), 125.1 (C34), 126.9, 127.1 (C3, C4), 128.0 (C2), 128.7 (C33, C35), 129.1 (C32, C36), 130.1 (C4’), 130.8 (C3’, C5’), 133.1 (C25), 136.8 (C26), 139.4, 140.2, 140.3 (C1, C6, C31), 148.9 (C28), 150.5 (C29), 156.7 (C1’), 169.2 (C20), 170.3 (C12'), 170.9 (C10'), 173.7 (C11), C10' could not be localized.

**Ind-[C(O)C1TyrP]2**: Rf (9:1 AcOEt/MeOH) = 0.8; RT (column I, solvent B, 210 nm) = 27.5 min; 1H NMR (CDCl3): 1.30 (s, 9H, H23), 1.37, 1.39 (2s, 36H, CH3 Boc and tBu), 1.60 (m, 1H, H13), 2.00-3.17 (m, 20H, H7, H12, H13, H15-19, H30, H7’), 3.43 (s, 2H, H24), 4.20 [m, 2H, H11'b], 4.37 (m, 2H, H8’), 4.55 [s, 2H, H11'a], 4.99 (m, 2H, H9’), 5.30 (m, 2H, H8 and H14), 5.68 (m, 1H, H9), 6.17 (d, *J* 8.8, 1H, H10), 6.71 (d, *J* 8.6, 2H, H2’a, H6’b), 6.77 (d, *J* 8.6, 2H, H2’bl, H6’b), 7.02 (d, *J* 8.6, 4H, H3’, H5’), 7.05-7.27 (m, 11H, H2-5, H21, H27, H32-36), 7.58 (dt, *J* 7.8, 1.6, 1H, H26), 8.49 (m, 2H, H28, H29); 13C NMR (CDCl3): 28.0, 28.4 (CH3 Boc and tBu), 29.0 (C23), 35.7 (C13), 37.4 (C7), 37.7 (C7'), 39.9 (C30), 45.9 (C12), 49.5 (C18), 51.1 (C22), 52.3, 55.6 (C16, C17), 55.0, 55.1, 55.2 (C9, C8’), 58.7 (C15), 60.1 (C24), 65.4, 65.6 (C11'), 66.6 (C19), 71.3 (C14), 77.3 (C8), 79.7(C Boc), 82.0 (C OtBu), 114.6, 114.7 (C2’, C6’), 123.5 (C27), 123.9 (C5), 125.0 (C34), 126.9, 127.4 (C3, C4), 128.3 (C2), 128.6 (C33, C35), 128.9 (C32, C36), 129.8, 130.0 (C4’), 130.6, 130.7 (C3’, C5’), 132.9 (C25), 136.8 (C26), 139.0 (C1, C6), 140.3 (C31), 149.0 (C29), 150.5 (C28), 155.1 (C(O) Boc), 156.7, 156.8 (C1’), 168.1 (C20), 169.2, 170.0 (C12'), 170.8, 170.9 (C10'), 174.2 (C11).

**Ind(8)-C(O)C4TyrP** and **Ind-[C(O)C4TyrP]2**.

**Ind(8)-C(O)C4TyrP**: Rf (9:1 AcOEt/MeOH) = 0.4; 1H NMR (CDCl3): 1.27 (*s*, 9H, H23), 1.35 (*s*, 18H, CH3 Boc and tBu), 1.61 (*m*, 4H, H12', H13'), 2.00 (*m*, 4H, H13, H14'), 2.20-3.20 (*m*, 16H, H7, H12, H15-19, H30, H7’), 3.42 (*s*, 2H, H24), 3.79 (*m*, 3H, H14, H11'), 4.32 (*m*, 1H, H8’), 5.01 (*d*, *J* 8.4, 1H, H9’), 5.22 (*td*, *J* 5.3, 1.0, 1H, H8), 5.59 (*dd*, *J* 9.1, 5.3, 1H, H9), 6.36 (*d*, *J* 9.1, 1H, H10), 6.70 (*d*, *J* 8.5, 2H, H2’, H6’), 6.99 (*d*, *J* 8.5, 2H, H3’, H5’), 7.05-7.26 (*m*, 10H, H2-5, H27, H32-36), 7.54 (*d*, *J* 7.9, 1H, H26), 7.60 (*bs*, 1H, H21), 8.44 (*m*, 2H, H28, H29); 13C NMR (CDCl3): 21.4 (C13'), 28.6 (C12'), 28.0, 28.4 (CH3 Boc and tBu), 29.1 (C23), 33.7 (C14'), 37.6, 37.7 (C7, C7’), 38.4 (C13), 39.4 (C30), 46.1 (C12), 48.2 (C18), 51.1 (C22), 52.8, 54.8 (C16, C17), 55.0 (C9, C8’), 60.2 (C24), 61.6 (C15), 64.3 (C19), 66.0 (C14), 67.3 (C11'), 75.9 (C8), 79.6 (C Boc), 81.9 (C OtBu), 114.4 (C2’, C6’), 123.4 (C27), 123.7 (C5), 125.1 (C34), 126.3, 127.0 (C3, C4), 128.1 (C2), 128.4 (C33, C35), 128.5 (C4’), 128.9 (C32, C36), 130.5 (C3’, C5’), 132.6 (C25), 136.8 (C26), 139.4, 139.8 (C1, C6), 141.0 (C31), 149.1 (C28), 150.5 (C29), 155.1 (C(O) Boc), 157.9 (C1’), 169.5 (C20), 171.0 (C10'), 172.4 (C15'), 174.9 (C11).

**Ind-[C(O)C4TyrP]2**: Rf (AcOEt) = 0.5, Rf (9:1 AcOEt/MeOH) = 0.7; 1H NMR (CD3OD):1.26 (*s*, 9H, H23), 1.39 (*s*, 36H, CH3 Boc and tBu), 1.68, 1.77 (*2m*, 8H, H12', H13'), 2.10-3.25 (*m*, 24H, H7, H12, H13, H15-19, H30, H7’, H14'), 3.51 (*s*, 2H, H24), 3.82, 3.89 (*2m*, 4H, H11'), 4.16 (*m*, 2H, H8’), 5.15 (*m*, 1H, H14), 5.44 (*t*, *J* 5.0, 1H, H8), 5.59 (*d*, *J* 5.3, 1H, H9), 6.71 (*d*, *J* 8.6, 2H, H2’, H6’), 6.78 (*d*, *J* 8.6, 2H, H2’, H6’), 7.07 (*d*, *J* 8.6, 2H, H3’, H5’), 7.10 (*d*, *J* 8.6, 2H, H3’, H5’), 7.18-7.42 (*m*, 10H, H2-5, H27, H32-36), 7.77 (*d*, *J* 7.8, 1H, H26), 8.42 (*m*, 2H, H28, H29); 13C NMR (CD3OD): 22.6, 22.8 (C13'), 29.8, 29.9 (C12'), 28.3, 28.7 (CH3 Boc and tBu), 29.2 (C23), 34.7, 35.0 (C14'), 35.2 (C13), 38.1, 38.3 (C7, C7’), 40.7 (C30), 45.3 (C12), 51.8 (C18), 52.1 (C22), 53.2, 56.3 (C16, C17), 56.9, 57.5 (C8', C9), 60.0 (C24), 60.6 (C15), 68.3 (C19), 68.6, 68.8 (C11'), 71.2 (C14), 77.0 (C8), 80.6 (C Boc), 82.8 (C OtBu), 115.5 (C2’, C6’), 125.2 (C27), 125.3 (C5), 126.0 (C34), 127.6, 128.2 (C3, C4), 129.3 (C2), 129.7 (C33, C35), 130.2 (C32, C36), 130.4, 130.5 (C4’), 131.4, 131.5 (C3’, C5’), 135.3 (C25), 139.2 (C26), 140.3, 141.1 (C1, C6), 141.6 (C31), 149.1 (C28), 150.9 (C29), 157.8 (C(O) Boc), 159.3, 159.4 (C1’), 172.8 (C20), 173.1 (C10'), 174.6, 175.1 (C15'), 177.2 (C11).

**Nelf(1)-C(O)C4TyrP**, **Nelf(18)-C(O)C4TyrP** **and** **Nelf-[C(O)C4TyrP]2**.

**Nelf(1)-C(O)C4TyrP**: Rf (1:1 cyclohexane/AcOEt) = 0.4; 1H NMR (CD3OD): 1.16 (*s*, 9H, H32), 1.40 (*s*, 18H, CH3 Boc and tBu), 1.45-2.30 (*m*, 18H, H21-27, H12'-14'), 2.24 (*s*, 3H, H7), 2.55-3.15 (*m*, 7H, H19, H20, H28, H7’), 3.41 (*dd*, *J* 13.5, 10.5, 1H, H11b), 3.55 (*dd*, *J* 13.5, 4.4, 1H, H11a), 3.96-4.22 (*m*, 4H, H18, H8’, H11'), 4.45 (*m*, 1H, H10), 6.85 (*d*, *J* 8.5, 2H, H3’, H5’), 7.05-7.36 (*m*, 8H, H2-4, H14-16, H2’, H6’), 7.51 (*d*, *J* 7.2, 2H, H13, H17); 13C NMR (CD3OD): 13.7 (C7), 21.8, 27.2, 27.5, 31.8 (C22-25), 22.9 (C13'), 29.8 (C12'), 28.3, 28.8 (CH3 Boc and tBu), 28.9 (C32), 32.2 (C11), 34.6 (C27), 35.4 (C14'), 37.7 (C21), 35.2 (C26), 38.1 (C7’), 51.9 (C31), 54.4 (C10), 57.3 (C8’), 59.8 (C19), 60.3 (C20), 68.7 (C11'), 70.6 (C18), 71.1 (C28), 80.5 (C Boc), 82.7 (C OtBu), 115.5 (C2’, C6’), 124.7, 126.1 (C2, C4), 127.1, 127.8 (C3, C15), 129.5 (C4’), 130.1 (C14, C16), 130.5 (C6), 131.0 (C13, C17), 131.5 (C3’, C5’), 137.8, 140.2 (C5, C12), 151.1 (C1), 157.9 (C(O) Boc), 159.6 (C1’), 172.2 (C15'), 173.1, 173.2 (C29, C10'), 176.2 (C8).

**Nelf(18)-C(O)C4TyrP**: Rf (1:1 cyclohexane/AcOEt) = 0.55; 1H NMR (CD3OD):1.11 (*s*, 9H, H32), 1.40 (*s*, 18H, CH3 Boc and tBu), 1.45-2.15 (*m*, 16H, H21-27, H12', H13'), 2.21 (*s*, 3H, H7), 2.39 (*m*, 2H, H14'), 2.55-3.10 (*m*, 7H, H19, H20, H28, H7’), 3.56 (*m*, 2H, H11), 3.92 (*m*, 2H, H11'), 4.16 (*m*, 1H, H8’), 4.59 (*m*, 1H, H10), 5.39 (*m*, 1H, H18), 6.75-7.35 (*m*, 10H, H2-4, H14-16, H2’, H3’, H5’, H6’), 7.52 (*d*, *J* 7.2, 2H, H13, H17); 13C NMR (CD3OD): 13.1 (C7), 22.7 (C13'), 21.8, 27.3, 27.6, 32.0 (C22-25), 28.4, 28.7 (CH3 Boc and tBu), 29.0 (C32), 29.8 (C12'), 32.2 (C11), 35.0 (C27), 35.2 (C26), 35.9 (C14'), 37.6 (C21), 38.1 (C7’), 52.1 (C31, C10), 56.5 (C19), 57.4 (C8’), 60.4 (C20), 68.5 (C11'), 71.0 (C28), 72.7 (C18), 80.7 (C Boc), 82.8 (C OtBu), 115.5 (C2’, C6’), 116.0 (C2), 119.4 (C4), 123.2 (C6), 127.5 (C3, C15), 130.0 (C14, C16), 130.4 (C4’), 131.2 (C13, C17), 131.4 (C3’, C5’), 137.2, 140.1 (C5, C12), 157.1 (C1), 158.0 (C(O) Boc), 159.5 (C1’), 173.1, 173.5 (C29, C10'), 174.2 (C15'), 176.1 (C8).

**Nelf-[C(O)C4TyrP]2**: Rf (1:1 cyclohexane/AcOEt) = 0.7; 1H NMR (CD3OD):1.12 (*s*, 9H, H32), 1.38 (*s*, 36H, CH3 Boc and tBu), 1.50-2.15 (*m*, 20H, H21-27, H12', H13', H14'b), 2.20 (*s*, 3H, H7), 2.38 (*m*, 2H, H14'a), 2.55-3.10 (*m*, 9H, H19, H20, H28, H7’), 3.56 (*m*, 2H, H11), 3.90 (*m*, 2H, H11'), 3.99 (*m*, 2H, H11'), 4.17 (*m*, 2H, H8’), 4.59 (*m*, 1H, H10), 5.41 (*m*, 1H, H18), 6.75-7.35 (*m*, 14H, H2-4, H14-16, H2’, H3’, H5’, H6’), 7.53 (*d*, *J* 7.1, 2H, H13, H17); 13C NMR (CD3OD): 13.6 (C7), 22.6, 22.9 (C13'), 29.9 (C12'), 21.7, 27.2, 27.5, 31.9 (C22-25), 28.3, 28.8 (CH3 Boc and tBu), 29.0 (C32), 32.2 (C11), 38.2 (C7’), 34.5 (C27), 35.0, 35.5 (C14'), 35.3 (C26), 37.6 (C21), 52.0 (C31), 52.2 (C10), 56.6 (C19), 57.4 (C8’), 60.4 (C20), 68.7 (C11'), 71.0 (C28), 72.6 (C18), 80.6 (C Boc), 82.8 (C OtBu), 115.6 (C2’, C6’), 124.7, 126.1 (C2, C4), 127.4 (C15), 127.9 (C3), 129.3 (C4’), 130.1 (C14, C16), 130.3 (C6), 131.3 (C13, C17), 131.6 (C3’, C5’), 137.1, 140.3 (C5, C12), 151.3 (C1), 157.8 (C(O) Boc), 159.6 (C1’), 172.2 (C10'), 173.2 (C29, C15'b), 174.3 (C15'a), 176.2 (C8).

**Carbamate conjugates**

**Saq-C(O)NC4TyrP**: Rf (9:1 AcOEt/MeOH) = 0.75; 1H NMR (CDCl3): 1.32 (*s*, 9H, H41), 1.40 (*s*, 18H, CH3 Boc and tBu), 1.45-1.85 (*m*, 12H, H31-34, H12', H13'), 2.25-3.00 (*m*, 15H, H13, H19, H27, H29, H30, H35-37, H7’), 3.15 (m, 2H, H14'), 3.89 (*m*, 2H, H11'), 4.38 (*m*, 3H, H18, H8’), 4.90 (*m*, 1H, H12), 5.02 (*d*, *J* 7.9, 1H, H9’), 5.08 (*m*, 1H, H26), 5.38 (*m*, 1H, H15'), 6.02 (*bs*, 1H, H39), 6.62-6.64 (*m*, 2H, H15), 6.77 (*d*, *J* 8.3, 2H, H3’, H5’), 6.91 (*m*, 1H, H23), 7.02-7.20 (*m*, 6H, H21, H22, H24, H25, H2’, H6’), 7.57 (*td*, *J* 1.6, 7.9, 1H, H3), 7.67-7.76 (*m*, 2H, H2, H17), 7.81 (*d*, *J* 7.9, 1H, H4), 8.10 (*d*, *J* 8.5, 1H, H1), 8.19 (*d*, *J* 8.4, 1H, H6), 8.25 (*d*, *J* 8.7, 1H, H7), 9.19 (*d*, *J* 6.8, 1H, H11); 13C NMR (CDCl3): 20.6, 25.6, 26.2, 30.7 (C31-34), 26.6 (C13'), 28.0, 28.4 (CH3 Boc and tBu), 28.8 (C41), 29.6 (C12'), 30.9 (C36), 33.1 (C35), 35.6 (C19), 35.8 (C30), 37.4, 37.5 (C13, C7’), 40.8 (C14'), 49.9 (C18), 50.9 (C40), 52.1 (C12), 55.1 (C8’), 57.1 (C27), 59.6 (C29), 67.4 (C11'), 70.3 (C37), 73.9 (C26), 79.6 (C Boc), 81.9 (C OtBu), 114.4 (C2’, C6’), 118.7 (C7), 126.3 (C23), 127.6 (C3), 128.1 (C4), 128.4 (C22, C24, C4’), 129.2 (C21, C25), 129.3 (C5), 130.0, 130.1 (C1, C2), 130.5 (C3’, C5’), 137.3 (C6, C20), 146.6 (C9), 149.1 (C8), 155.1 (C(O) Boc), 156.3 (C16'), 157.9 (C1’), 164.6 (C10), 170.3 (C38), 171.1 (C10'), 173.4, 174.1 (C14, C16).

**Ind(14)-C(O)NC4TyrP**. Rf (9:1 AcOEt/MeOH) = 0.75; 1H NMR (CDCl3): 1.31 (*s*, 9H, H23), 1.37 (*s*, 18H, CH3 Boc and tBu), 1.40-1.80 (*m*, 6H, H13, H12', H13'), 2.10-3.25 (*m*, 18H, H7, H12, H15-19, H30, H7’, H14'), 3.18 (*s*, 2H, H24), 3.83 (*m*, 2H, H11'), 4.20 (*m*, 1H, H8), 4.35 (*m*, 1H, H8’), 5.04 (*m*, 1H, H14), 5.10 (*d*, *J* 8.2, 1H, H9’), 5.24 (*m*, 1H, H9), 5.38 (*m*, 1H, H15'), 6.33 (*d*, *J* 7.0, 1H, H10), 6.75 (*d*, *J* 8.2, 2H, H2’, H6’), 6.90-7.40 (*m*, 15H, H2-5, H26-29, H32-36, H3’, H5’), 7.65 (*bs*, 1H, H21); 13C NMR (CDCl3): 26.6, 26.8 (C12', C13'), 28.0, 28.3 (CH3 Boc and tBu), 28.8 (C23), 36.2 (C13), 37.5 (C7’), 39.2 (C7), 40.0 (C30), 40.8 (C14'), 46.1 (C12), 50.9 (C22), 51.0 (C18), 52.2, 56.0 (C16, C17), 55.0 (C8’), 57.8 (C9), 59.7 (C24), 65.8 (C15), 67.4 (C19, C11'), 70.4 (C14), 73.1 (C8), 79.5 (C Boc), 81.8 (C OtBu), 114.4 (C2’, C6’), 124.7 (C27), 124.9 (C5), 126.6, 126.8 (C3, C4, C34), 127.8 (C2), 128.5 (C25, C4’), 128.6 (C33, C35), 129.0 (C32, C36), 130.5 (C3’, C5’), 139.5 (C26), 139.6, 140.3 (C1, C6, C31), 149.4 (C28), 150.7 (C29), 155.1 (C(O) Boc), 156.5 (C16'), 157.8 (C1’), 170.7 (C20), 171.0 (C10'), 174.2 (C11); ESI(+) MS: m/z = 1049.0 (M+H)+ and 1071.0 (M+Na)+, and ESI(-) MS: m/z = 1047.2 (M-H)- and 1161.3 (M+CF3CO2H)- in agreement with the calculated mass for [M] = C59H81N7O10.

**Nelf(18)-C(O)NC4TyrP**: Rf (3:2 CH2Cl2/AcOEt) = 0.7; 1H NMR (CD3OD): 1.15 (*s*, 9H, H32), 1.37 (*s*, 18H, CH3 Boc and tBu), 1.50-2.20 (*m*, 16H, H21-27, H12', H13'), 2.22 (*s*, 3H, H7), 2.60-3.70 (*m*, 11H, H11, H19, H20, H28, H7’, H14'), 3.89 (*m*, 2H, H11'), 4.15 (*m*, 1H, H8’), 4.51 (*m*, 1H, H10), 5.21 (*m*, 1H, H18), 6.70-7.35 (*m*, 6H, H2-4, H2’, H3’, H5’, H6’), 7.46 (*d*, *J* 7.4, 2H, H13, H17); 13C NMR (CD3OD): 13.3 (C7), 27.8 (C12', C13'), 21.9, 27.2, 27.6, 32.1 (C22-25), 28.5, 28.9 (CH3 Boc and tBu), 29.1 (C32), 32.1 (C24), 32.3 (C11), 35.3 (C26), 35.8 (C27), 37.6 (C21), 38.3 (C7’), 41.7 (C14'), 52.1 (C10), 52.2 (C31), 57.4 (C19, C8’), 60.7 (C20), 68.9 (C11'), 71.2 (C28), 73.8 (C18), 80.8 (C Boc), 83.0 (C OtBu), 115.6 (C2’, C6’), 117.1 (C2), 119.5 (C4), 123.5 (C6), 127.4 (C3, C15), 130.2 (C14, C16), 130.3 (C4’), 131.3 (C3’, C5’), 131.6 (C13, C17), 137.2 (C12), 140.0 (C5), 157.0 (C1), 157.8 (C(O) Boc), 158.4 (C16'), 159.5 (C1’), 173.2, 173.5 (C29, C10'), 176.2 (C8).
